# Supplementary material for: Antibiotic-resistant bacteria, antibiotic resistance genes, and antibiotic residues in wastewater from a poultry slaughterhouse after conventional and advanced treatments
Source: PubMed Central journal article supplement (PMC8371126; doi:10.1038/s41598-021-96169-y), 2021-08-17
Supplement: 41598_2021_96169_MOESM1_ESM.pdf [file 41598_2021_96169_MOESM1_ESM.pdf]

## *Supplementary Material*

### **Antibiotic-resistant bacteria, antibiotic resistance genes, and antibiotic residues in wastewater from a poultry slaughterhouse after conventional and advanced treatments**

Mykhailo Savin\*, Johannes Alexander, Gabriele Bierbaum, Jens Andre Hammerl, Norman Hembach, Thomas Schwartz, Ricarda Maria Schmithausen, Esther Sib, Alexander Voigt, Judith Kreyenschmidt

\*corresponding author:

Dr. Mykhailo Savin, Institute for Hygiene and Public Health, Medical Faculty, University of Bonn, Venusberg-Campus 1, 53127 Bonn, Germany. Electronic address: [m.savin@unibonn.de](mailto:m.savin@unibonn.de)

**Table S1** Temperature profile for every qPCR run, annealing temperature was the same for every primer used.

| <b>Temperature</b> | <b>Time</b>    | <b>Reaction step</b>                      | <b>Cycle</b> |
|--------------------|----------------|-------------------------------------------|--------------|
| 90 °C              | 10 min         | Initial denaturation and enzym-activation | x 1          |
| 90 °C              | 15 sec         | Denaturation                              | x 40         |
| 60 °C              | 1 min          | Annealing/Elongation                      |              |
| 60 – 90 °C         | 5 sec / 0,5 °C | Melt curve                                | x 1          |

PCR reagent ratio for each qPCR reaction volume was: 10  $\mu$ L 2x Maxima Sybr Green Master Mix, 0.5  $\mu$ L forward and 0.5  $\mu$ L reverse primer (final concentration was 250 nM each), 8  $\mu$ L nuclease free PCR water and 1  $\mu$ L template DNA.

**Table S2** Full primer sequences of investigated FPB and ARGs with corresponding calibration curve, efficiency and LOD.

| target                                 | primer sequence                                                     | calibration curve         | amplicon | efficiency | R <sup>2</sup> | LOD | reference strain                      | literature              |
|----------------------------------------|---------------------------------------------------------------------|---------------------------|----------|------------|----------------|-----|---------------------------------------|-------------------------|
| <b>facultative pathogenic bacteria</b> |                                                                     |                           |          |            |                |     |                                       |                         |
| enterococci                            | Fwd:<br>AGAAATCCAAACGAACTT<br>G Rev:<br>CAGTGCTCTACCTCCATCAT<br>T   | $F(x) = -3.585x + 35.283$ | 93 bp    | 90.1 %     | 1.000          | 65  | <i>E. faecium</i><br>DSM20477         | (Frahm et al. 2003)     |
| <i>P. aeruginosa</i>                   | Fwd: AGCGTTCGTCCTGCACAAGT Rev:<br>TCCACCATGCTCAGGGAGAT              | $F(x) = -3.282x + 35.276$ | 81 bp    | 101.7 %    | 0.999          | 3   | <i>P. aeruginosa</i><br>DSM1117       | (Clifford et al. 2012)  |
| <i>K. pneumoniae</i>                   | Fwd:<br>ACGGCCGAATATGACGAATT<br>C Rev:<br>AGAGTGATCTGCTCATGAA       | $F(x) = -3.387x + 38.844$ | 68 bp    | 97.4 %     | 0.998          | 18  | <i>K. pneumoniae</i><br>DSM30104      | (Clifford et al. 2012)  |
| <i>A. baumannii</i>                    | Fwd:<br>GTTGTGGCTTTAGGTTTATTATACG<br>Rev: AAGTTACTCGACGCAATTCG      | $F(x) = -3.380x + 35.679$ | 94 bp    | 97.6 %     | 1.000          | 31  | <i>A. baumannii</i><br>DSM30007       | (Clifford et al. 2012)  |
| <i>E. coli</i>                         | Fwd: GCATCGTGACCACCTTGA Rev:<br>CAGCGTGGTGGCAAAA                    | $F(x) = -3.361x + 35.797$ | 59 bp    | 98.4 %     | 0.994          | 4   | <i>E. coli</i><br>DSM1103             | (Clifford et al. 2012)  |
| <b>antibiotic resistance genes</b>     |                                                                     |                           |          |            |                |     |                                       |                         |
| <i>ermB</i>                            | Fwd: TGAATCGAGACTTGAGTGTGCAA Rev:<br>GGATTCTACAAGCGTACCTT           | $F(x) = -3.328x + 35.901$ | 71 bp    | 100 %      | 1.000          | 16  | <i>S. hyointestinalis</i><br>DSM20770 | (Alexander et al. 2015) |
| <i>tetM</i>                            | Fwd:GGTTTCTCTTGGATACTTAAATC<br>AATC Rev:<br>CCAACCATAAATCCTTGTTTCRC | $F(x) = -3.424x + 38.747$ | 88 bp    | 95.9 %     | 0.998          | 4   | <i>E. coli</i> DH5 $\alpha$           | (Peak et al. 2007)      |
| <i>bla</i> <sub>TEM</sub>              | Fwd: TTCCTGTTTTTGCTCACCCAG Rev:<br>CTCAAGGATCTTACCGCTGTTG           | $F(x) = -3.303x + 38.559$ | 112 bp   | 100.8 %    | 0.999          | 80  | <i>E. coli</i> pNORM                  | (Rocha et al. 2018)     |

|                               |                                                                   |                           |        |         |       |     |                                       |                                           |
|-------------------------------|-------------------------------------------------------------------|---------------------------|--------|---------|-------|-----|---------------------------------------|-------------------------------------------|
| <i>sul1</i>                   | Fwd:<br>CGCACCGGAAACATCGCTGCAC<br>Rev:<br>TGAAGTCCGCCGCAAGGCTCG   | $F(x) = -3.387x + 39.802$ | 161 bp | 97.6 %  | 0.999 | 80  | <i>E. coli</i> pNORM                  | (Rocha et al. 2018)                       |
| <i>bla<sub>CMY-2</sub></i>    | Fwd:<br>CGTTAATCGCACCATCACC<br>Rev:<br>CGTCTTACTAACCGATCCTA<br>GC | $F(x) = -3.591x + 34.026$ | 172 bp | 89.9 %  | 0.998 | 71  | <i>K. pneumoniae</i><br>NRZ-01013     | (Kurpiel and Hanson 2011)                 |
| <i>vanA</i>                   | Fwd:<br>TCTGCAATAGAGATAGCCG<br>C Rev:<br>GGAGTAGCTATCCCAGCAT<br>T | $F(x) = -3.541x + 33.078$ | 376 bp | 91.6 %  | 1.000 | 43  | <i>E. faecium</i> B7641               | (Klein et al. 1998)                       |
| <i>mcr-1</i>                  | Fwd:<br>GGGCCTGCGTATTTTAAGC<br>G Rev:<br>CATAGGCATTGCTGTGCGT<br>C | $F(x) = -3.386x + 35.349$ | 183 bp | 97.4 %  | 0.999 | 8   | <i>E. coli</i> NRZ-14408              | (Hembach et al. 2017)                     |
| <i>bla<sub>NDM-1</sub></i>    | Fwd: TTGGCCTTGCTGTCCTTG<br>Rev: ACACCAGTGACAATATCACCG             | $F(x) = -3.293x + 35.877$ | 82 bp  | 101.2 % | 0.999 | 66  | <i>K. pneumoniae</i><br>ATCC BAA-2146 | (Monteiro et al. 2012)                    |
| <i>bla<sub>CTX-M15</sub></i>  | Fwd:<br>CGCTTTGCGATGTGCAG<br>Rev:<br>ACCGGATATCGTTGGT             | $F(x) = -3.504x + 34.255$ | 551 bp | 92.9 %  | 1.000 | 93  | <i>E. coli</i> pNORM                  | (Paterson et al. 2003, Rocha et al. 2018) |
| <i>bla<sub>CTX-M-32</sub></i> | Fwd:<br>CGTCACGCTGTTGTTAGGA<br>A Rev:<br>CGCTCATCAGCACGATAAA<br>G | $F(x) = -3.517x + 37.800$ | 155 bp | 92.5 %  | 1.000 | 235 | <i>E. coli</i> pNORM                  | (Rocha et al. 2018)                       |
| <i>bla<sub>OXA-48</sub></i>   | Fwd: TGTTTTTGGTGGCATCGAT Rev:<br>GTAAMRATGCTTGGTTCCG              | $F(x) = -3.540x + 36.913$ | 177 bp | 91.6 %  | 0.998 | 92  | <i>K. pneumoniae</i><br>TGH Isolate 2 | (Monteiro et al. 2012)                    |

**Table S3** List of all investigated antibiotics and their metabolites (limit of quantification, ng/L)

| <b>β-Lactams</b>                   |                     |                       |                                 |                          |
|------------------------------------|---------------------|-----------------------|---------------------------------|--------------------------|
| <b>Penicillins</b>                 |                     |                       |                                 |                          |
| Amoxicillin (50)                   | Ampicillin (200)    | Penicillin G (50)     | Cloxacillin (20)                | Dicloxacillin (20)       |
| Flucloxacillin (20)                | Methicillin (10)    | Mezlocillin (20)      | Nafcillin (20)                  | Oxacillin (10)           |
| Penicilin V (20)                   | Piperacillin (100)  |                       |                                 |                          |
| <b>Carbapenems</b>                 |                     |                       |                                 |                          |
| Meropenem (200)                    |                     |                       |                                 |                          |
| <b>Cephalosporines</b>             |                     |                       |                                 |                          |
| Cefaclor (50)                      | Cefotaxime (50)     | Ceftazidime (100)     |                                 |                          |
| <b>Macrolides and lincosamides</b> |                     |                       |                                 |                          |
| Azithromycin (50)                  | Clarithromycin (50) | Clindamycin (20)      | Erythromycin (20)               | Anhydroerythromycin (20) |
| Roxithromycin (50)                 | Spiramycin (100)    | Tylosin (50)          |                                 |                          |
| <b>Tetracyclines</b>               |                     |                       |                                 |                          |
| Chlortetracycline (200)            | Doxycycline (200)   | Oxytetracycline (200) | Tetracycline (200)              |                          |
| <b>Fluoroquinolones</b>            |                     |                       |                                 |                          |
| Ciprofloxacin (200)                | Enrofloxacin (200)  | Moxifloxacin (200)    | Ofloxacin (200)                 |                          |
| <b>Sulfonamides</b>                |                     |                       |                                 |                          |
| Sulfachlorpyridazine (50)          | Sulfadiazine (100)  | Sulfadimethoxine (50) | Sulfadimidine (20)              | Sulfadoxine (50)         |
| Sulfaethoxypyridazine (50)         | Sulfamerazine (50)  | Sulfamethoxazole (20) | N4-Acetylsulfamethoxazole (100) |                          |
| Sulfamethoxy-pyridazine (10)       | Sulfathiazole (100) | Trimethoprim (20)     |                                 |                          |
| <b>Others</b>                      |                     |                       |                                 |                          |
| Linezolid (100)                    | Vancomycin (100)    | Metronidazole (100)   |                                 |                          |
